# Supplementary material
Source: PubMed Central journal article supplement (PMC2668042)
Supplement: mmc1.pdf [file mmc1.pdf]

Supplemental Data

Identification of a 2 Mb Human Ortholog

of *Drosophila eyes shut/spacemaker*

that Is Mutated in Patients with Retinitis Pigmentosa

Rob W.J. Collin, Karin W. Littink, B. Jeroen Klevering, L. Ingeborgh van den Born, Robert K. Koenekoop, Marijke N. Zonneveld, Ellen A.W. Blokland, Tim M. Strom, Carel B. Hoyng, Anneke I. den Hollander, and Frans P.M. Cremers

Figure S1. Cloning Strategy of Human *EYS* cDNA

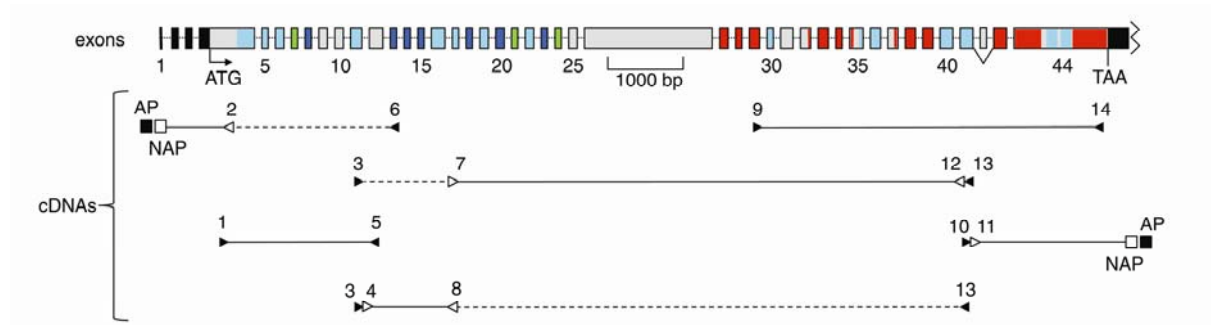

Primer sequences are listed in Table S1. AP (filled square) and NAP (open square) denote RACE adaptor and nested adaptor primers, respectively. Filled and open arrowheads represent regular and nested RT-PCR primers. Dashed lines denote primary RT-PCR products.



AJHG, Volume 83

|      |             |            |            |            |            |            |            |            |
|------|-------------|------------|------------|------------|------------|------------|------------|------------|
|      | Exon 4      |            |            |            |            |            |            |            |
| 801  | TGAATGTTTC  | TGAAACATCT | TTCGTTGGCT | GTGTGCAAAA | TACCACAACG | GAAGATCAGT | TACTTTTTGG | CTGCAGACTA |
|      | ACTTACAAAG  | ACTTTGTAGA | AAGCAACCGA | CACACGTTTT | ATGGTGTTC  | CTTCTAGTCA | ATGAAAAACC | GACGTCTGAT |
|      | Exon 4      |            |            |            |            |            |            |            |
| 881  | AAAGGAATGC  | ACACTGTAA  | TTCTAAGTGG | CTGAGTGTG  | GGACACATTA | TTTTATCACA | GTTATGGCAA | GTGGTCCATC |
|      | TTTCCTTACG  | TGTGACAATT | AAGATTCACC | GACTCACAAC | CCTGTGTAAT | AAAATAGTGT | CAATACCGTT | CACCAGGTAG |
|      | Exon 4      |            |            |            |            |            |            |            |
| 961  | ACCTTGTTCCA | CTGGGACTTC | GACTAAATGT | GACAGTGAAA | CAGCAGTCT  | GCCAGGAATC | TCTGAGTTCA | GAATTTTGCT |
|      | TGGAACAGGT  | GACCCTGAAG | CTGATTTACA | CTGTCACTTT | GTCGTCAAGA | CGGTCCTTAG | AGACTCAAGT | CTTAAAACGA |
|      | Exon 4      |            |            |            |            |            |            |            |
| 1041 | CTGGTCATGG  | TAAATGTCTT | AGTGAAGCTT | GGAGCAAGAC | ATATAGCTGC | CATTGCCAGC | CTCCATTTTC | TGGAAAATAC |
|      | GACCAGTACC  | ATTTACAGAA | TCACTTCGAA | CCTCGTTCTG | TATATCGACG | GTAACGGTCG | GAGGTAAAAG | ACCTTTTATG |
|      | Exon 4      |            |            |            |            |            |            |            |
| 1121 | TGCCAGGAAC  | TTGATGCATG | TTCTTTTAAA | CCATGTAAAA | ATAATGGCAG | TTGCATTAAT | AAAAGAGAAA | ATTGGGATGA |
|      | ACGGTCCTTG  | AACTACGTAC | AAGAAAATTT | GGTACATTTT | TATTACCGTC | AACGTAATTA | TTTTCTCTTT | TAACCCTACT |
|      | Exon 4      |            |            |            | Exon 5     |            |            |            |
| 1201 | GCAAGCATAT  | GAATGTGTCT | GTCACCCACC | ATTTACAGGA | AAGAATTGCT | CAGAAATAAT | TGGCCAGTGT | CAACCACATG |
|      | CGTTCGTATA  | CTTACACAGA | CAGTGGGTGG | TAAATGTCCT | TTCTTAACGA | GTCTTTATTA | ACCGGTCACA | GTTGGTGTAC |
|      | Exon 5      |            |            |            | Exon 6     |            |            |            |
| 1281 | TCTGTTTCCA  | TGGAAACTGC | AGCAATATTA | CTTCAAATAG | TTTCATTTGT | GAATGTGATG | AGCAATTTTC | AGGTCCATTC |
|      | AGACAAAGGT  | ACCTTTGACG | TCGTTATAAT | GAAGTTTATC | AAAGTAAACA | CTTACACTAC | TCGTTAAAAG | TCCAGGTAAG |
|      | Exon 6      |            |            |            |            |            |            |            |
| 1361 | TGTGAGGTGT  | CAGCAAACC  | TTGTGTTTCT | CTGCTTTTTT | GGAAAAGAGG | AATTTGCCCA | AATAGCAGTT | CTGCTTATAC |
|      | ACACTCCACA  | GTCGTTTTGG | AACACAAAGA | GACGAAAAAA | CCTTTTCTCC | TTAAACGGGT | TTATCGTCAA | GACGAATATG |
|      | Exon 6      |            |            |            |            |            |            |            |
| 1441 | TTATGAATGC  | CCAAAAGGAT | CTTCCAGCCA | AAATGGTGAA | ACTGATGTCA | GTGAGTTTTC | ATTAGTACCA | TGTCAGAATG |
|      | AATACTTACG  | GGTTTTCTTA | GAAGTCGGT  | TTTACCCTT  | TGACTACAGT | CACTCAAAG  | TAATCATGGT | ACAGTCTTAC |
|      | Exon 6      |            |            |            | Exon 7     |            |            |            |
| 1521 | GTACTGACTG  | CATCAAATA  | TCAAATGATG | TTATGTGCAT | CTGTTACCA  | ATATTTACAG | ATTGCTTTG  | TAAGAGCATT |
|      | CATGACTGAC  | GTAGTTTAT  | AGTTACTAC  | AATACACGTA | GACAAGTGGT | TATAAATGTC | TAAACGAAAC | ATTCTCGTAA |



|      |             |            |            |            |            |            |            |            |        |
|------|-------------|------------|------------|------------|------------|------------|------------|------------|--------|
|      | Exon 7      |            |            |            |            |            |            |            | Exon 8 |
| 1601 | CAAACATCAT  | GTGAGTCATT | TCCTTTGAGG | AATAATGCTA | CATGTAAGAA | ATGTGAGAAA | GATTATCCTT | GCAGCTGTAT |        |
|      | GTTTGTAGTA  | CACTCAGTAA | AGGAAACTCC | TTATTACGAT | GTACATTCTT | TACACTCTTT | CTAATAGGAA | CGTCGACATA |        |
|      | Exon 8      |            |            |            |            |            |            |            |        |
| 1681 | ATCAGGATTT  | ACTGAAAAAA | ACTGTGAGAA | AGCAATTGAC | CACTGTAAAC | TGCTCAGCAT | CAACTGTCTG | AATGAAGAAT |        |
|      | TAGTCCTAAA  | TGACTTTTTT | TGACACTCTT | TCGTAACTG  | GTGACATTG  | ACGAGTCGTA | GTTGACAGAC | TTACTTCTTA |        |
|      | Exon 9      |            |            |            |            |            |            |            |        |
|      | Exon 8      |            |            |            |            |            |            |            |        |
| 1761 | GGTGTTCCTAA | TATAATTGGA | AGATTCAAAT | ATGTATGCAT | TCCAGGGTGC | ACAAAAAATC | CATGTTGGTT | TTGAAGAAT  |        |
|      | CCACAAAGTT  | ATATTAACCT | TCTAAGTTTA | TACATACGTA | AGGTCCCACG | TGTTTTTTAG | GTACAACCAA | AAACTTCTTA |        |
|      | Exon 9      |            |            |            |            |            |            |            |        |
| 1841 | GTTTACCTAA  | TTCATCAACA | CCTCTGCTAC | TGTGGAGTCA | CCTTCCATGG | TATTTGCCAA | GATAAAGGTC | CTGCTCAATT |        |
|      | CAAATGGATT  | AAGTAGTTGT | GGAGACGATG | ACACCTCAGT | GGAAGGTACC | ATAAACGGTT | CTATTCCAG  | GACGAGTTAA |        |
|      | Exon 10     |            |            |            |            |            |            |            |        |
|      | Exon 9      |            |            |            |            |            |            |            |        |
| 1921 | TGAATATGTG  | TGGCAATTGG | GATTTCAGG  | ATCTGAAGGC | GAAAAGTGCC | AAGGGTTAT  | TGATGCCTAT | TTCTTTCTGG |        |
|      | ACTTATACAC  | ACCGTTAACC | CTAAACGTCC | TAGACTTCCG | CTTTTCACGG | TTCCCAATA  | ACTACGGATA | AAGAAAGACC |        |
|      | Exon 10     |            |            |            |            |            |            |            |        |
| 2001 | CTGCAAACCTG | CACTGAAGAT | GCAACCTATG | TGAACGATCC | TGAAGATAAT | AATTCTTCAT | GTTGGTTCCC | ACATGAAGGC |        |
|      | GACGTTTGAC  | GTGACTTCTA | CGTTGGATAC | ACTTGCTAGG | ACTTCTATTA | TTAAGAAGTA | CAACCAAGGG | TGACTTCCG  |        |
|      | Exon 11     |            |            |            |            |            |            |            |        |
|      | Exon 10     |            |            |            |            |            |            |            |        |
| 2081 | ACAAAAGAGA  | TTTGTGCAAA | TGGATGCAGT | TGTTGAGTG  | AAGAAGACAG | TCAGGAATAT | CGGTATCTAT | GTTTTCTCAG |        |
|      | TGTTTTCTCT  | AAACACGTTT | ACCTACGTCA | ACAAACTCAC | TTCTTCTGTC | AGTCCTTATA | GCCATAGATA | CAAAAGAGTC |        |
|      | Exon 11     |            |            |            |            |            |            |            |        |
| 2161 | ATGGGCTGGC  | AACATGTATC | TGGAAAATAC | AACTGATGAT | CAAGAAAATG | AGTGTCAACA | TGAAGCTGTT | TGTAAAGATG |        |
|      | TACCCGACCG  | TTGTACATAG | ACCTTTTATG | TTGACTACTA | GTTCTTTTAC | TCACAGTTGT | ACTTCGACAA | ACATTTCTAC |        |
|      | Exon 12     |            |            |            |            |            |            |            |        |
|      | Exon 11     |            |            |            |            |            |            |            |        |
| 2241 | AAATTAATAG  | ACCCAGATGC | AGCTGTTCTC | TTAGTTACAT | TGGCAGATTG | TGTGTTGTCA | ATGTTGACTA | TTGCTTAGGG |        |
|      | TTAATTATC   | TGGGTCTACG | TCGACAAGAG | AATCAATGTA | ACCGTCTAAC | ACACAACAGT | TACAACTGAT | AACGAATCCC |        |
|      | Exon 12     |            |            |            |            |            |            |            |        |
| 2321 | AACCACAGTA  | TATCAGTGCA | TGGCCTCTGC | CTGGCCCTTT | CGCACAATTG | TAAGTGTAGC | GGTCTGCAAA | GATATGAAAG |        |
|      | TTGGTGTCTAT | ATAGTCACGT | ACCGGAGACG | GACCGGGAAA | GCGTGTAAAC | ATTGACATCG | CCAGACGTTT | CTATACTTTC |        |

AJHG, Volume 83

|      |            |            |            |            |            |            |            |            |             |             |            |            |            |            |            |            |
|------|------------|------------|------------|------------|------------|------------|------------|------------|-------------|-------------|------------|------------|------------|------------|------------|------------|
|      | Exon 12    |            |            |            |            |            |            |            |             |             |            |            |            |            |            |            |
| 2401 | GAACATCTGT | GAGATAGATA | CTGAAGACTG | CAAATCTGCG | TCCCGCAAAA | ATGGAACAAC | TAGTACACAT | TTAAGGGGAT | CTTGATAGACA | CTCTATCTAT  | GACTTCTGAC | GTTTAGACGC | AGGGCGTTTT | TACCTTGTTG | ATCATGTGTA | AATTCCCCTA |
|      | Exon 12    |            |            |            |            |            |            |            |             |             |            |            |            |            |            |            |
|      | Exon 13    |            |            |            |            |            |            |            |             |             |            |            |            |            |            |            |
| 2481 | ATTTCTTCCG | CAAGTGTGTC | CCAGGATTTA | AAGGTACGCA | ATGTGAAATT | GATATAGATG | AGTGTGCTTC | ACATCCCTGC | TAAAGAAGGC  | GTTACACACAG | GGTCCTAAAT | TTCCATGCGT | TACACTTTAA | CTATATCTAC | TCACACGAAG | TGTAGGGACG |
|      | Exon 13    |            |            |            |            |            |            |            |             |             | Exon 14    |            |            |            |            |            |
| 2561 | AAAAATGGAG | CCACCTGCAT | TGACCAACCT | GGTAATTACT | TCTGCCAGTG | TGTGCCTCCA | TTTAAAGTGG | TTGATGGCTT | TTTTACCTC   | GGTGGACGTA  | ACTGGTTGGA | CCATTAATGA | AGACGGTCAC | ACACGGAGGT | AAATTTACC  | AACTACCGAA |
|      | Exon 14    |            |            |            |            |            |            |            |             |             | Exon 14    |            |            |            |            |            |
| 2641 | TTCTGCTTA  | TGCAATCCAG | GCTATGTTGG | GATAAGATGT | GAACAGGACA | TTGATGACTG | CATCCTGAAT | GCCTGTGAGC | AAGGACGAAT  | ACGTTAGGTC  | CGATACAACC | CTATTCTACA | CTTGTCTGT  | AACTACTGAC | GTAGGACTTA | CGGACACTCG |
|      | Exon 14    |            |            | Exon 15    |            |            |            |            |             |             |            |            |            |            |            |            |
| 2721 | ACAATCTAC  | CTGCAAAGAC | CTGCATCTCA | GCTACCAGTG | TGTGTGCCTA | TCTGATTGGG | AAGGAAATTT | TTGTGAACAA | TGTTAAGATG  | GACGTTTCTG  | GACGTAGAGT | CGATGGTCAC | ACACACGGAT | AGACTAACCC | TTCTTTTAA  | AACACTTGTT |
|      | Exon 15    |            |            |            |            |            |            |            |             |             | Exon 16    |            |            |            |            |            |
| 2801 | GAATCCAATG | AGTGAAAAT  | GAATCCTTG  | AAGAACAATT | CCACCTGTAC | TGACCTTTAC | AAAAGCTATC | GATGTGAGTG | CTTAGGTTAC  | TCACATTTTA  | CTTAGGAACG | TTCTTGTTAA | GGTGGACATG | ACTGGAAATG | TTTTCGATAG | CTACACTCAC |
|      | Exon 16    |            |            |            |            |            |            |            |             |             | Exon 16    |            |            |            |            |            |
| 2881 | TACATCTGGA | TGACTGGAC  | AGAACTGTAG | TGAAGAAATA | AATGAATGCG | ACTCTGATCC | ATGCATGAAT | GGAGGTCTTT | ATGTAGACCT  | ACCTGACCTG  | TCTTGACATC | ACTTCTTTAT | TTACTTACGC | TGAGACTAGG | TACGTACTTA | CCTCCAGAAA |
|      | Exon 16    |            |            |            |            |            |            |            |             |             | Exon 16    |            |            |            |            |            |
| 2961 | GTCATGAATC | TACCATCCCT | GGACAATTTG | TATGTCTGTG | CCCACCCCTT | TATACTGGAC | AATTTTGCCA | CCAACGCTAT | CAGTACTTAG  | ATGGTAGGGA  | CCTGTAAAC  | ATACAGACAC | GGGTGGGGAA | ATATGACCTG | TTAAAACGGT | GGTTGCGATA |
|      | Exon 16    |            |            |            |            |            |            |            |             |             | Exon 16    |            |            |            |            |            |
| 3041 | AACCTTTGTG | ACCTACTTCA | TAACCTTGC  | AGAAACAACT | CAACATGCTT | AGCTTTGGTA | GACGCAAATC | AGCATTGTAT | TTGGAAACAC  | TGGATGAAGT  | ATTGGGAACG | TCTTTGTTGA | GTTGTACGAA | TCGAAACCAT | CTGCGTTTAG | TCGTAACATA |
|      | Exon 16    |            |            |            |            |            |            |            |             |             | Exon 17    |            |            |            |            |            |
| 3121 | TTGTAGAGAA | GAATTTGAAG | GAAAAAAGT  | TGAAATTGAT | GTGAAAGACT | GCCTCTTCTT | TTCCTGCCAG | GATTATGGTG | AACATCTCTT  | CTTAAACTTC  | CTTTTTTGAC | ACTTTAACTA | CACCTTCTGA | CGGAGAAGGA | AAGGACGGTC | CTAATACCAC |



AJHG, Volume 83

|      |             |             |             |            |            |            |            |            |
|------|-------------|-------------|-------------|------------|------------|------------|------------|------------|
|      | Exon 17     |             |             | Exon 18    |            |            |            |            |
| 3201 | ACTGTGAAGA  | TATGGTCAAC  | AATTTTCAGGT | GTATTTGCAG | ACCTGGGTTT | TCTGGATCTC | TGTGTGAAAT | TGAAATTAAT |
|      | TGACACTTCT  | ATACCAGTTG  | TTAAAGTCCA  | CATAAACGTC | TGGACCCAAA | AGACCTAGAG | ACACACTTTA | ACTTTAATTA |
|      | Exon 18     |             |             | Exon 19    |            |            |            |            |
| 3281 | GAATGTTCT   | CTGAACCTTG  | CAAAAATAAT  | GGAACATGTG | TGGATCTGAC | AAACAGATTT | TTTTGTAATT | GTGAACCTGA |
|      | CTTACAAGGA  | GACTTGGAAC  | GTTTTTATTA  | CCTTGACAC  | ACCTAGACTG | TTTGTCTAAA | AAAACATTAA | CACTTGGACT |
|      | Exon 19     |             |             | Exon 20    |            |            |            |            |
| 3361 | GTACCATGGG  | CCCTTCTGTG  | AACTTGATGT  | AAATAAATGT | AAAATCTCAC | CTTGTCTAGA | TGAAGAAAAT | TGTGTCTACA |
|      | CATGGTACCC  | GGGAAGACAC  | TTGAACTACA  | TTTATTTACA | TTTTAGAGTG | GAACAGATCT | ACTTCTTTTA | ACACAGATGT |
|      | Exon 19     |             |             | Exon 20    |            |            |            |            |
| 3441 | GGACTGATGG  | ATACAACCTGC | CTCTGTGCC   | CTGGTTATAC | AGGCATCAAC | TGTGAAATAA | ATCTAGATGA | ATGCCTATCA |
|      | CCTGACTACC  | TATGTTGACG  | GAGACACGGG  | GACCAATATG | TCCGTAGTTG | ACACTTTATT | TAGATCTACT | TACGGATAGT |
|      | Exon 20     |             |             | Exon 21    |            |            |            |            |
| 3521 | GAGCCCTGTC  | TCCATGATGG  | AGTTTGTATC  | GATGGCATCA | ATCATTATAC | CTGTGACTGC | AAGAGTGGGT | TTTTTGGAAC |
|      | CTCGGGACAG  | AGGTACTACC  | TCAAACATAG  | CTACCGTAGT | TAGTAATATG | GACACTGACG | TTCTCACCCA | AAAAACCTTG |
|      | Exon 20     |             |             | Exon 21    |            |            |            |            |
| 3601 | ACACTGTGAA  | ACAAACGCCA  | ATGATTGCCT  | TTCAAATCCT | TGTCTACATG | GAAGGTACAC | AGAACTTATT | AATGAATATC |
|      | TGTGACTACT  | TGTTGCGGT   | TACTAACGGA  | AAGTTTAGGA | ACAGATGTAC | CTCCATGTG  | TCTTGAATAA | TTACTTATAG |
|      | Exon 21     |             |             | Exon 22    |            |            |            |            |
| 3681 | CATGTTTCATG | TGATGCAGAT  | GGGACTAGCA  | CACAATGTAA | GATCAAAATT | AATGACTGCA | CATCAATCCC | TTGTATGAAT |
|      | GTACAAGTAC  | ACTACGTCTA  | CCCTGATCGT  | GTGTTACATT | CTAGTTTAA  | TTACTGACGT | GTAGTTAGGG | AACATACTTA |
|      | Exon 22     |             |             | Exon 22    |            |            |            |            |
| 3761 | GAAGGCTTCT  | GTCAGAAGTC  | AGCACATGGA  | TTTACTTGCA | TTTGCCACG  | TGGATACACT | GGTGCATACT | GTGAAAAAAG |
|      | CTTCCGAAGA  | CAGTCTTCAG  | TCGTGTACCT  | AAATGAACGT | AAACGGGTGC | ACCTATGTGA | CCACGTATGA | CACTTTTTTC |
|      | Exon 22     |             |             | Exon 22    |            |            |            |            |
| 3841 | CATTGATAAT  | TGTGCTGAGC  | CTGAACTTAA  | TTCAGTCATC | TGTCTTAATG | GAGGGATCTG | TGTTGATGGG | CCTGGACATA |
|      | GTAECTATTA  | ACACGACTCG  | GACTTGAATT  | AAGTCAGTAG | ACAGAATTAC | CTCCCTAGAC | ACAACTACCC | GGACCTGTAT |

AJHG, Volume 83

|      |            |            |             |             |            |            |             |            |            |            |            |            |            |            |            |            |
|------|------------|------------|-------------|-------------|------------|------------|-------------|------------|------------|------------|------------|------------|------------|------------|------------|------------|
|      | Exon 23    |            |             |             |            |            |             |            |            |            |            |            |            |            |            |            |
|      | Exon 22    |            |             |             |            |            |             |            |            |            |            |            |            |            |            |            |
| 3921 | CTTTTGACTG | CAGATGTCTT | CCTGGATTTT  | CTGGTCAATT  | TTGTGAAATT | AATATAAATG | AATGCTCTTC  | ATCACCATGT | GAAACTGAC  | GTCTACAGAA | GGACCTAAAA | GACCAGTTAA | AACACTTTAA | TTATATTTAC | TTACGAGAAG | TAGTGGTACA |
|      | Exon 23    |            |             |             |            |            |             |            |            |            | Exon 24    |            |            |            |            |            |
| 4001 | CTACATGGTG | CAGACTGTGA | AGATCACATC  | AATGGACATG  | TTTGCAAATG | CCAACCAGGA | TGGTCTGGAC  | ACCACTGTGA | GATGTACCAC | GTCTGACACT | TCTAGTGTAG | TTACCTGTAC | AAACGTTTAC | GTTTGGTCCT | ACCAGACCTG | TGGTGACACT |
|      | Exon 24    |            |             |             |            |            |             |            |            |            |            |            |            |            |            |            |
| 4081 | GAATGAGCTT | GAGTGCATTC | CCAACCTCATG | TGTTTCATGAA | CTCTGCATGG | AGAATGAACC | TGGCTCGACA  | TGTTTATGCA | CTTACTCGAA | CTCAGTAAG  | GGTTGAGTAC | ACAAGTACTT | GAGACGTACC | TCTTACTTGG | ACCGAGCTGT | ACAAATACGT |
|      | Exon 24    |            | Exon 25     |             |            |            |             |            |            |            |            |            |            |            |            |            |
| 4161 | CACCTGGATT | TATGACCTGC | TCCATTGGGC  | TTCTTTGTGG  | TGATGAAATA | AGGAGAATTA | CCTGTTTAAAC | TCCCATCTTT | GTGGACCTAA | ATACTGGACG | AGGTAACCCG | AAGAAACACC | ACTACTTTAT | TCCTCTTAAT | GGACAAATTG | AGGGTAGAAA |
|      | Exon 25    |            |             |             |            |            |             |            |            |            |            |            |            |            |            |            |
| 4241 | CAAAGAACAG | ATCCCATTTT | CACACAGACA  | TATACAATTC  | CCCCTTCTGA | GACTTTGGTC | AGCAGCTTTC  | CATCTATAAA | GTTTCTTGTC | TAGGGTAAAG | GTGTGTCTGT | ATATGTAAAG | GGGGAAGACT | CTGAAACCAG | TCGTCGAAAG | GTAGATATTT |
|      | Exon 25    |            |             |             |            |            |             |            |            |            | Exon 26    |            |            |            |            |            |
| 4321 | GGCTACTAGA | ATACCAGCCA | TAATGGACAC  | TTACCCAGTT  | GATCAAGGTC | CAAAACAGAC | AGGCATTGTC  | AAGCACGACA | CCGATGATCT | TATGGTCGGT | ATTACCTGTG | AATGGGTCAA | CTAGTTCCAG | GTTTTGTCTG | TCCGTAACAG | TTCGTGCTGT |
|      | Exon 26    |            |             |             |            |            |             |            |            |            |            |            |            |            |            |            |
| 4401 | TTCTCCCAAC | CACTGGTTTG | GCAACATTAA  | GAATTAGCAC  | ACCCTTGGA  | AGCTACTTAC | TCCAAGAACT  | GATTGTCACT | AAGAGGGTTG | GTGACCAAAC | CGTTGTAATT | CTTAATCGTG | TGGGAACCTT | TCGATGAATG | AGGTTCTTGA | CTAACAGTGA |
|      | Exon 26    |            |             |             |            |            |             |            |            |            |            |            |            |            |            |            |
| 4481 | AGAGAGCTTT | CAGCAAAACA | CAGTCTTCTT  | TCTTCCGCAG  | ATGTTTCCTC | TTCTCGATTG | CTGAATTTTG  | GTATTCGTGA | TCTCTCGAAA | GTCGTTTTGT | GTCAGAAGAA | AGAAGGCGTC | TACAAAGGAG | AAGAGCTAAG | GACTTAAAC  | CATAAGCACT |
|      | Exon 26    |            |             |             |            |            |             |            |            |            |            |            |            |            |            |            |
| 4561 | CCCAGCACAA | ATTGTCCAGG | ACAAAACATC  | GGTATCACAT  | ATGCCTATTC | GAACTTCTGC | AGCCACACTA  | GGTTTCTTTT | GGGTCGTGTT | TACAGGTCC  | TGTTTTGTAG | CCATAGTGTG | TACGGATAAG | CTTGAAGACG | TCGGTGTGAT | CCAAAGAAAA |
|      | Exon 26    |            |             |             |            |            |             |            |            |            |            |            |            |            |            |            |
| 4641 | TTCCTGATAG | GAGAGCAAGG | ACCCCATTTA  | TCATGTCTTC  | CTTAATGTCA | GATTTTATTT | TTCTACACA   | ATCTTTATTA | AAGGACTATC | CTCTCGTTCC | TGGGGTAAAT | AGTACAGAAG | GAATTACAGT | CTAAAATAAA | AAGGATGTGT | TAGAAATAAT |



AJHG, Volume 83

Exon 26

4721 TTTGAGAACT GTCAGACTGT TGCTTTATCT GCTACCCCAA CCACTTCAGT AATTAGAAGC ATTCCAGGGG CTGATATTGA  
AAACTCTTGA CAGTCTGACA ACGAAATAGA CGATGGGGTT GCTGAAGTCA TTAATCTTCG TAAGGTCCCC GACTATAACT

Exon 26

4801 GCTAAACAGG CAGTCATTAC TCTCCCGTGG ATTCCTGCTT ATAGCTGCCT CCATAAGTGC AACTCCAGTT GTCTCTAGGG  
CGATTTGTCC GTCAGTAATG AGAGGGCACC TAAGGACGAA TATCGACGGA GGTATTCACG TTGAGGTCAA CAGAGATCCC

Exon 26

4881 GGGCTCAAGA GGATATTGAA GAATATTCAG CTGATTCTTT AATTTCAGA AGAGAGCACT GGAGATTGCT CAGCCCCTCG  
CCCGAGTCTT CCTATAACTT CTTATAAGTC GACTAAGAAA TTAAAGTTCT TCTCTCGTGA CCTCTAACGA GTCGGGGAGC

Exon 26

4961 ATGTCTCCCA TTTTCTCTGC TAAGGTAATT ATATCTAAAC AGGTAACCAT CTTAAACTCA TCAGCTCTGC ACCGGTTCAG  
TACAGAGGGT AAAAAGGACG ATTCCATTAA TATAGATTG TCCATTGGTA GAATTTGAGT AGTCGAGACG TGGCCAAGTC

Exon 26

5041 TACAAAAGCC TTCAATCCCA GTGAATATCA GGCTATTACT GAGGCTTCAA GCAACCAGAG ACTCACAAAC ATCAAATCAC  
ATGTTTTTCGG AAGTTAGGGT CACTTATAGT CCGATAATGA CTCCGAAGTT CGTTGGTCTC TGAGTGTGTTG TAGTTTAGTG

Exon 26

5121 AGGCTGCTGA TTCTTTAAGA GAATTAAGCC AAACATGTGC AACATGTTCT ATGACTGAAA TAAAATCCTC TCGTGAATTC  
TCCGACGACT AAGAAATTCT CTTAATTCGG TTTGTACACG TTGTACAAGA TACTGACTTT ATTTTAGGAG AGCACTTAAG

Exon 26

5201 TCAGATCAAG TTTTGCATAG CAAACAGTCC CACTTTTATG AGACATTCTG GATGAACTCA GCGATATTAG CCAGCTGGTA  
AGTCTAGTTC AAAACGTATC GTTTGTCAGG GTGAAAATAC TCTGTAAGAC CTAATTGAGT CGCTATAATC GGTCGACCAT

Exon 26

5281 TGCACAAATG GGAGCTCAAA CTATCACTTC TGGGCATTCA TTTTCTTCTG CTAAGTAAAT AACACCATCA GTGGCATTCA  
ACGTGATTAC CCTCGAGTTT GATAGTGAAG ACCCGTAAGT AAAAGAAGAC GATGACTTTA TTGTGGTAGT CACCGTAAGT

Exon 26

5361 CAGAAGTGCC ATCTTTATTT CCTTCTAAAA AGAGTGCAAA AAGAACAATT TTATCCTCAT CCTTGGAAGA ATCCATTACC  
GTCTTCACGG TAGAAATAAA GGAAGATTTT TCTCACGTTT TTCTTGTTAA AATAGGAGTA GGAACCTTCT TAGGTAATGG

Exon 26

5441 CTATCAAGTA ATTTGGATGT TAATTTATGT TTGGATAAGA CTTGTTTATC CATTGTCCCT TCACAAACTA TCTCTCAGA  
GATAGTTCAT TAAACCTACA ATTAAATACA AACCTATCT GAACAAATAG GTAACAGGGA AGTGTGTTGAT AGAGAAGTCT

Exon 26

5521 CTTGATGAAT TCTGATTGTA CTTCAAAAA GACTACTGAT GAACTGTCAG TATCAGAAAA CATTTTAAAA CTATTGAAAA  
GAACTACTTA AGACTAAACT GAAGTTTTTA CTGATGACTA CTTGACAGTC ATAGTCTTTT GTAAAATTTT GATAACTTTT



AJHG, Volume 83

|      |            |            |            |             |             |            |             |            |            |            |
|------|------------|------------|------------|-------------|-------------|------------|-------------|------------|------------|------------|
|      | Exon 26    |            |            |             |             |            |             |            |            |            |
| 5601 | TAAGACAATA | TGGCATAACT | ATGGGACCCA | CTGAGGTA    | AAATCAAGAG  | AGCTTATTGG | ACATGGAAAA  | AAGTAAAGGA | ATTCTGTTAT | ACCGTATTGA |
|      | TACCCTGGGT | GACTCCATGA | TTTAGTTCTC | TCGAATAACC  | TGTACCTTTT  | TTCATTTCTT |             |            |            |            |
|      | Exon 26    |            |            |             |             |            |             |            |            |            |
| 5681 | TCTCATAAC  | TGTTCAAAC  | TCACCCAAG  | GATAGTTCT   | TGGATTTGA   | GTTAAACTTA | CAAATTTATC  | CGGATGTTAC | AGAGTATGTG | ACAAGTTTGA |
|      | AGTGGGTCA  | CTATCAAGAG | ACCTAAACT  | CAATTTGAAT  | GTTTAAATAG  | GCCTACAATG |             |            |            |            |
|      | Exon 26    |            |            |             |             |            |             |            |            |            |
| 5761 | TTTAAAGACA | TATTCAGAAA | TTACACATGC | AAATGACTTC  | AAAAATAATC  | TGCCACCATT | GACAGGCTCA  | GTGCCTGATT | AAATTTCTGT | ATAAGTCTTT |
|      | AATGTGTACG | TTTACTGAAG | TTTTTATTAG | ACGGTGGTAA  | CTGTCCGAGT  | CACGGACTAA |             |            |            |            |
|      | Exon 26    |            |            |             |             |            |             |            |            |            |
| 5841 | TTTCAGAAGT | CACCACCAAT | GTTGCATTTT | ATACAGTTTC  | AGCAACTCCA  | GCACTTTCAA | TACAGACGTC  | TTCCTCCATG | AAAGTCTTCA | GTGGTGGTTA |
|      | CAACGTAAAA | TATGTCAAAG | TCGTTGAGGT | CGTGAAAGTT  | ATGTCTGCAG  | AAGGAGGTAC |             |            |            |            |
|      | Exon 26    |            |            |             |             |            |             |            |            |            |
| 5921 | TCTGTAATTA | GCCAGATTG  | GCCATATTTT | ACAGATTATA  | TGACCTCTCT  | TAAAAAAGAG | GTCAAGACTT  | CTTCAGAATG | AGACATTAAT | CCGGTCTAAC |
|      | CGGTATAAAA | TGTCTAATAT | ACTGGAGAGA | ATTTTTTCTC  | CAGTTCTGAA  | GAAGTCTTAC |             |            |            |            |
|      | Exon 26    |            |            |             |             |            |             |            |            |            |
| 6001 | GTCCAAATGG | GAACTTCAGC | CTAGTGTGCA | ATATCAGGAA  | TTCCCCTACTG | CAAGCCGGCA | TCTTCCCTTC  | ACTAGATCTC | CAGGTTTACC | CTTGAAGTCG |
|      | GATCACACGT | TATAGTCCTT | AAAGGGTGAC | GTTCCGGCCGT | AGAAGGGGAA  | TGATCTAGAG |             |            |            |            |
|      |            |            |            |             | Exon 27     |            |             |            |            |            |
|      | Exon 26    |            |            |             |             |            |             |            |            |            |
| 6081 | TTACTTTGTC | TTCACTGGAA | TCCATTCTGG | CACCTCAACG  | GCTGATGATT  | TCTGATTTCA | GTTGTGTTTCG | TTATTATGGA | AATGAAACAG | AAGTGACCTT |
|      | AGGTAAGACC | GTGGAGTTGC | CGACTACTAA | AGACTAAAGT  | CAACACAAGC  | AATAATACCT |             |            |            |            |
|      | Exon 27    |            |            |             |             |            |             |            |            |            |
| 6161 | GATTCTTATC | TAGAATTTCA | GAATGTGGCT | TTAAATCCAC  | AAAATAACAT  | CTCCCTAGAA | TTTCAGACCT  | TCAGCTCCTA | CTAAGAATAG | ATCTTAAAGT |
|      | CTTACACCGA | AATTTAGGTG | TTTTATTGTA | GAGGGATCTT  | AAAGTCTGGA  | AGTCGAGGAT |             |            |            |            |
|      | Exon 27    |            |            |             |             |            |             |            |            |            |
| 6241 | TGGACTTCTG | CTGCATGTCA | AGCAAGACTC | AAATTTAGTA  | GATGGATTTT  | TTATTCAATT | GTTTATTGAA  | AATGGTACTT | ACCTGAAGAC | GACGTACAGT |
|      | TCGTTCTGAG | TTTAAATCAT | CTACCTAAAA | AATAAGTTAA  | CAAATAACTT  | TTACCATGAA |             |            |            |            |
|      | Exon 28    |            |            |             |             |            |             |            |            |            |
|      | Exon 27    |            |            |             |             |            |             |            |            |            |
| 6321 | TAAAGTACCA | CTTTTACTGT | CCTGGTGAAG | CAAATTTTAA  | AAGCATTAAT  | ACTACTGTTA | GAGTGGACAA  | CGGGCAAAG  | ATTCATGGT  | GAAAATGACA |
|      | GGACCACTTC | GTTTTAAATT | TTCGTAATTA | TGATGACAAAT | CTCACCTGTT  | GCCCGTTTTC |             |            |            |            |

AJHG, Volume 83

|      |            |            |             |            |            |            |             |            |
|------|------------|------------|-------------|------------|------------|------------|-------------|------------|
|      | Exon 29    |            |             |            |            |            |             |            |
|      | Exon 28    |            |             |            |            |            |             |            |
| 6401 | TATACACTGC | TTATCAGGCA | AGAATTGGAT  | CCATGTAACG | CTGAGCTGAC | TATTTTAGGG | AGGAATACAC  | AAATATGCCA |
|      | ATATGTGACG | AATAGTCCGT | TCTTAACCTA  | GGTACATTGC | GACTCGACTG | ATAAAATCCC | TCCTTATGTG  | TTTATACGCT |
|      | Exon 29    |            |             |            |            |            |             |            |
| 6481 | ATCTATCAAT | CATGTACTCG | GA AAACCCCT | GCCAAAATCA | GGATCTGTCT | TCATTGGTGG | ATTTCCAGAC  | CTTCATGGGA |
|      | TAGATAGTTA | GTACATGAGC | CTTTTGGGGA  | CGGTTTTAGT | CCTAGACAGA | AGTAACCACC | TAAAGGTCTG  | GAAGTACCCT |
|      | Exon 30    |            |             |            |            |            |             |            |
|      | Exon 29    |            |             |            |            |            |             |            |
| 6561 | AAATCCAGAT | GCCTGTACCA | GTCAAGAATT  | TTACTGGCTG | CATAGAAGTT | ATAGAAATAA | ATAACTGGAG  | ATCTTTCATT |
|      | TTTAGGTCTA | CGGACATGGT | CAGTTCCTAA  | AATGACCGAC | GTATCTTCAA | TATCTTTAT  | TATTGACCTC  | TAGAAAGTAA |
|      | Exon 31    |            |             |            |            |            |             |            |
|      | Exon 30    |            |             |            |            |            |             |            |
| 6641 | CCATCCAAGG | CAGTGAAAAA | CTATCACATT  | AACAATTGCA | GATCCAGGG  | ATTTATGCTG | TCTCCAACAG  | CCTCCTTGT  |
|      | GGTAGGTTC  | GTCACTTTT  | GATAGTGTA   | TTGTTAACGT | CTAGGTCCC  | TAAATACGAC | AGAGTTGTC   | GGAGGAAACA |
|      | Exon 31    |            |             |            |            |            |             |            |
| 6721 | TGATGCTTCT | GATGTGACAC | AAGGGGTTGA  | TACCATGTGG | ACTTCTGTCA | GCCCCTCTGT | TGCAGCACCC  | TCTGTGTGCC |
|      | ACTACGAAGA | CTACACTGTG | TTCCCCAACT  | ATGGTACACC | TGAAGACAGT | CGGGGAGACA | ACGTCGTGGG  | AGACACACGG |
|      | Exon 31    |            |             |            |            |            |             |            |
| 6801 | AGCAGGATGT | ATGCCACAAT | GGAGGCACAT  | GCCATGCCAT | CTTCCTCTCC | AGTGGCATAG | TGTCATTCCA  | ATGTGACTGT |
|      | TCGTCCTACA | TACGGTGTTA | CCTCCGTGTA  | CGGTACGGTA | GAAGGAGAGG | TCACCGTATC | ACAGTAAGGT  | TACACTGACA |
|      | Exon 32    |            |             |            |            |            |             |            |
|      | Exon 31    |            |             |            |            |            |             |            |
| 6881 | CCACTACATT | TCACTGGCCG | CTTCTGTGAA  | AAAGATGCAG | GTTTATTCTT | TCCATCTTTC | AATGGGAATT  | CCTATTTAGA |
|      | GGTGATGTAA | AGTGACCGGC | GAAGACACTT  | TTTCTACGTC | CAAATAAGAA | AGGTAGAAAG | TTACCCTTAA  | GGATAAATCT |
|      | Exon 32    |            |             |            |            |            |             |            |
| 6961 | ACTGCCCTTT | TTGAAGTTG  | TCCTGGAGAA  | GGAACATAAC | AGAACTGTTA | CCATCTACTT | GA CTATAAAA | ACAAACAGTT |
|      | TGACGGGAAA | AACTTCAAAC | AGGACCTCTT  | CCTTGTATTG | TCTTGACAAT | GGTAGATGAA | CTGATATTTT  | TGTTTGTCAA |
|      | Exon 33    |            |             |            |            |            |             |            |
|      | Exon 32    |            |             |            |            |            |             |            |
| 7041 | TAAATGGAAC | TATTCTTAC  | AGTAATGGGA  | ATAATTGTGG | AAAGCAGTTT | CTTCATTAT  | TTCTTGTGGA  | AGGAAGGCCA |
|      | ATTTACCTTG | ATAAGAAATG | TCATTACCCT  | TATTAACACC | TTTCGTCAA  | GAAGTAAATA | AAGAACACCT  | TCCTCCGGT  |
|      | Exon 33    |            |             |            |            |            |             |            |
| 7121 | TCAGTTAAAT | ATGGGTGTGG | AAATTCTCAA  | AATATTTTGA | CTGTTTCTGC | TAATTACAGC | ATTAACACAA  | ATGCATTCAC |
|      | AGTCAATTTA | TACCCACACC | TTTAAGAGTT  | TTATAAAACT | GACAAAGACG | ATTAATGTGC | TAATTGTGTT  | TACGTAAGTG |



AJHG, Volume 83

|      |            |            |            |            |            |            |             |             |
|------|------------|------------|------------|------------|------------|------------|-------------|-------------|
|      | Exon 33    |            |            | Exon 34    |            |            |             |             |
| 7201 | CCCTATCACA | ATACGCTACA | CAACGCCTGT | TGGCAGCCCT | GGAGTTGTTT | GTATGATTGA | AATGACTGCA  | GATGGAAAAC  |
|      | GGGATAGTGT | TATGCGATGT | GTTGCGGACA | ACCGTCGGGA | CCTCAACAAA | CATACTAACT | TTACTGACGT  | CTACCTTTTG  |
|      | Exon 34    |            |            | Exon 35    |            |            |             |             |
| 7281 | CTCCAGTACA | GAAGAAAGAC | ACAGAGATTT | CCCATGCCTC | TCAGGCATAT | TTTGAATCAA | TGTCCTTGG   | CCATATTCTC  |
|      | GAGGTCATGT | CTTCTTTCTG | TGTCTCTAAA | GGGTACGGAG | AGTCCGTATA | AAACTTAGTT | ACAAGGAACC  | GGTATAAGGA  |
|      | Exon 35    |            |            |            |            |            |             |             |
| 7361 | GCAAATGTTT | AAATTCATAA | GAAAGCAGGT | CCTGTTTATG | GGTTCAGGGG | CTGCATTCTA | GACCTTCAAG  | TAAACAACAA  |
|      | CGTTTACAAG | TTTAAGTATT | CTTTCGTCCA | GGACAAATAC | CCAAGTCCCC | GACGTAAGAT | CTGGAAGTTC  | ATTTGTTGTT  |
|      | Exon 35    |            |            |            |            |            |             |             |
| 7441 | AGAATTCTTC | ATCATCGATG | AAGCACGACA | TGGAAAGAAT | ATTGAGAACT | GCCACGTCCC | TTGGTGTGCT  | CATCATCTGT  |
|      | TCTTAAGAAG | TAGTAGCTAC | TTCGTGCTGT | ACCTTTCTTA | TAACTCTTGA | CGGTGCAGGG | AACCACACGA  | GTAGTAGACA  |
|      | Exon 35    |            |            | Exon 36    |            |            |             |             |
| 7521 | GCCGCAACAA | TGGCACCTGC | ATCAGTGATA | ATGAAAATCT | GTTTTGTGAG | TGTCCAAGGC | TGTATTCAGG  | CAAGCTGTGC  |
|      | CGGCGTTGTT | ACCGTGGACG | TAGTCACTAT | TACTTTTAGA | CAAAACACTC | ACAGGTTCCG | ACATAAGTCC  | GTTTCGACACG |
|      | Exon 36    |            |            |            |            |            |             |             |
| 7601 | CAGTTTGCAA | GTTGTGAAAA | CAACCCATGT | GGAAATGGTG | CCACCTGTGT | TCCAAAATCC | GGAACAGATA  | TTGTCTGCCT  |
|      | GTCAAACGTT | CAACACTTTT | GTTGGGTACA | CCTTTACCAC | GGTGGACACA | AGGTTTATAG | CCTTGTCTAT  | AACAGACGGA  |
|      | Exon 36    |            |            | exon 37    |            |            |             |             |
| 7681 | CTGCCCATAT | GGGAGGTCTG | GACCCCTCTG | CACTGATGCT | ATTAATATTA | CTCAGCCAAG | GTTCAAGTGC  | ACAGATGCCT  |
|      | GACGGGTATA | CCCTCCAGAC | CTGGGGAGAC | GTGACTACGA | TAATTATAAT | GAGTCGGTTC | CAAGTCACCG  | TGTCTACGGA  |
|      | exon 37    |            |            |            |            |            |             |             |
| 7761 | TTGGATACAC | CTCATTCCTG | GCTTATTCAC | GGATCTCAGA | CATCAGCTTC | CGTTATGAAT | TCCACCTGAA  | GTTTCAGCTG  |
|      | AACCTATGTG | GAGTAAGGAC | CGAATAAGTG | CCTAGAGTCT | GTAGTCGAAG | GCAATACTTA | AGGTGGACTT  | CAAAGTCGAC  |
|      | exon 37    |            |            | Exon 38    |            |            |             |             |
| 7841 | GCAAACAACC | ACTCAGCACT | GCAAAATAAC | TTGATATTTT | TTACTGAACA | GAAAGGCCAT | GGGTTGAATG  | GCGATGACTT  |
|      | CGTTTGTGTT | TGAGTCGTGA | CGTTTTATTG | AACTATAAAA | AATGACTTGT | CTTCCGGTA  | CCCAACTTAC  | CGCTACTGAA  |
|      | Exon 38    |            |            |            |            |            |             |             |
| 7921 | CCTGGCTGTG | GGCCTGCTCA | ATGGCAGTGT | GGTTTATAGT | TATAACCTGG | GGTCTGGCAT | AGCAAGCATC  | AGGAGCGAGC  |
|      | GGACCGACAC | CCGGACGAGT | TACCGTCACA | CCAAATATCA | ATATTGGACC | CCAGACCGTA | TCGTTTCGTAG | TCTTCGCTCG  |



AJHG, Volume 83

|      |            |            |            |             |            |            |            |            |            |            |            |            |             |            |            |            |
|------|------------|------------|------------|-------------|------------|------------|------------|------------|------------|------------|------------|------------|-------------|------------|------------|------------|
|      | Exon 38    |            |            |             |            |            |            |            |            | Exon 39    |            |            |             |            |            |            |
| 8001 | CCCTCAATCT | GAGCCTTGGG | GTCCACACTG | TTCATCTGGG  | CAAGTTCTTC | CAAGAGGGCT | GGCTGAAGGT | AGATGATCAT | GGGAGTTAGA | CTCGGAACCT | CAGGTGTGAC | AAGTAGACCC | GTTCAAGAAG  | GTTCTCCCGA | CCGACTTCCA | TCTACTAGTA |
|      | Exon 39    |            |            |             |            |            |            |            |            |            |            |            |             |            |            |            |
| 8081 | AAAAATAAAT | CCATTATCGC | CCCAGGAAGA | CTGGTTGGTC  | TCAATGTCTT | CAGTCAGTTT | TATGTAGGTG | GCTACAGTGA | TTTTTATTTA | GGTAATAGCG | GGGTCCTTCT | GACCAACCAG | AGTTACAGAA  | GTCAGTCAAA | ATACATCCAC | CGATGTCACT |
|      | Exon 39    |            |            |             |            |            |            |            |            |            |            |            | Exon 40     |            |            |            |
| 8161 | ATACACTCCA | GATCTCTTAC | CAAATGGAGC | AGATTTTTAAA | AATGGTTTTC | AAGGCTGTAT | TTTCACTCTT | CAAGTTCGCA | TATGTGAGGT | CTAGAGAATG | GTTTACCTCG | TCTAAAATTT | TTACCAAAAAG | TTCCGACATA | AAAGTGAGAA | GTTCAAGCGT |
|      | Exon 40    |            |            |             |            |            |            |            |            |            |            |            |             |            |            |            |
| 8241 | CTGAGAAGGA | TGGCCATTTT | AGAGGACTGG | GAAATCCTGA  | GGGCCACCCA | AATGCTGGAC | GCAGTGTGGG | CCAGTGTGAT | GACTCTTCCT | ACCGGTAAAG | TCTCCTGACC | CTTTAGGACT | CCCGGTGGGT  | TTACGACCTG | CGTCACAACC | GGTCACAGTA |
|      | Exon 40    |            |            |             |            |            |            |            |            |            |            |            | Exon 41     |            |            |            |
| 8321 | GCTTCTCCCT | GCAGTTTAAT | GAAATGTGGC | AATGGTGGGA  | CATGCATAGA | GAGTGGAACT | AGTGTTTACT | GCAATTGTAC | CGAAGAGGGA | CGTCAAATTA | CTTTACACCG | TTACCACCCT | GTACGTATCT  | CTCACCTTGA | TCACAAATGA | CGTTAACATG |
|      | Exon 41    |            |            |             |            |            |            |            |            |            |            |            |             |            |            |            |
| 8401 | CACTGGGTGG | AAAGGATCAT | TCTGCACAGA | GACAGTTTCT  | ACCTGTGATC | CTGAACATGA | CCCTCCACAC | CACTGTAGCA | GTGACCCACC | TTTCCTAGTA | AGACGTGTCT | CTGTCAAAGA | TGGACACTAG  | GACTTGTACT | GGGAGGTGTG | GTGACATCGT |
|      | Exon 41    |            |            |             |            |            |            |            |            |            |            |            |             |            |            |            |
| 8481 | GAGGAGCAAC | CTGCATTTCA | TTACCTCATG | GATACACCTG  | TTTCTGTCCT | CTAGGAACCA | CTGGAATCTA | CTGTGAACAA | CTCCTCGTTG | GACGTAAAGT | AATGGAGTAC | CTATGTGGAC | AAAGACAGGA  | GATCCTTGGT | GACCTTAGAT | GACACTTGTT |
|      | Exon 42    |            |            |             |            |            |            |            |            |            |            |            | Exon 43     |            |            |            |
| 8561 | GCATTATCC  | TCATTGTGAT | CTTGAAAAG  | CCAAAACCAG  | CAGAACGGAA | AGTGAAGAAG | GAGGCTTTAT | CCATAAGTGA | CGTGAATAGG | AGTAACACTA | GAACCTTTTC | GGTTTTGGTC | GTCTTGCCTT  | TCACTTCTTC | CTCCGAAATA | GGTATTCACT |
|      | Exon 43    |            |            |             |            |            |            |            |            |            |            |            |             |            |            |            |
| 8641 | TCCATCTTTC | AGAAGCAATG | AGTTATCCTG | GATGTCTTTT  | GCTTCCTTTC | ATGTTGAAA  | AAAGACACAT | ATTCAATTGC | AGGTAGAAAG | TCTTCGTTAC | TCAATAGGAC | CTACAGAAAA | CGAAGGAAAG  | TACAAGCTTT | TTTCTGTGTA | TAAGTTAACG |
|      | Exon 43    |            |            |             |            |            |            |            |            |            |            |            | Exon 44     |            |            |            |
| 8721 | AGTTTTAGCC | TCTCGCTGCA | GATGGTATCC | TATTTTATGC  | TGCACAACAC | TTAAAAGCCC | AATCAGGTGA | TTTTTTATGC | TCAAAGTCGG | AGAGCGACGT | CTACCATAGG | ATAAAATACG | ACGTGTTGTG  | AATTTTCGGG | TTAGTCCACT | AAAAAATACG |

AJHG, Volume 83

Exon 44

8801 ATCTCTTTAG TAAATAGTTC CGTTCAACTT CGCTACAACC TTGGCGACAG AACTATCATT CTAGAAACTC TCCAAAAAGT  
TAGAGAAATC ATTTATCAAG GCAAGTTGAA GCGATGTTGG AACCGCTGTC TTGATAGTAA GATCTTTGAG AGGTTTTTCA

Exon 44

8881 AACTATAAAC GGAAGTACTT GGCATATAAT AAAAGCAGGA AGAGTTGGTG CAGAAGGCTA CCTGGATCTA GATGGGATAA  
TTGATATTTG CCTTCATGAA CCGTATATTA TTTTCGTCCT TCTCAACCAC GTCTTCCGAT GGACCTAGAT CTACCCTATT

Exon 44

8961 ATGTAACAGA AAAGGCCTCC ACTAAAATGA GTTCTCTGGA CACAAATACA GACTTCTATA TTGGAGGAGT ATCTTCCTTA  
TACATTGTCT TTTCCGGAGG TGATTTTACT CAAGAGACCT GTGTTTTATGT CTGAAGATAT AACCTCCTCA TAGAAGAAAT

Exon 44

9041 AATCTTGTA AATCCCATGGC AATAGAAAAT GAACCTGTAG GTTTTCAAGG CTGTATCCGA CAAGTTATCA TAAATAATCA  
TTAGAACATT TAGGGTACCG TTATCTTTTA CTGGACATC CAAAAGTTCC GACATAGGCT GTTCAATAGT ATTTATTAGT

Exon 44

9121 AGAATTACAA TTAAGTGAAT TTGGAGCAAA AGGTGGCTCA AATGTAGGTG ACTGTGATGG GACAGCCTGT GGGTACAACA  
TCTTAATGTT AATTGACTTA AACCTCGTTT TCCACCGAGT TTACATCCAC TGACACTACC CTGTCCGACA CCCATGTTGT

Exon 44

9201 CATGCAGAAA TGGAGGTGAA TGTACAGTAA ATGGCACAAC TTTTTCTTGC AGATGTTTGC CAGATTGGGC TGGAAATACA  
GTACGTCTTT ACCTCCACTT ACATGTCATT TACCGTGTGG AAAAAGAACG TCTACAAACG GTCTAACCCG ACCTTTATGT

Exon 44

9281 TGTAACCAGT CTGTGTCCTG TTTGAATAAT CTTTGCCTCC ACCAATCTTT ATGTATACCT GACCAATCAT TTTCTTACAG  
ACATTGGTCA GACACAGGAC AAACCTATTA GAAACGGAGG TGGTTAGAAA TACATATGGA CTGGTTAGTA AAAGAATGTC

Exon 44

9361 TTGCCTGTGT ACTTTGGGTT GGGTGGGAAG GTATTGTGAA AACAAAACCTT CATTTTCAAC TGCAAAATTT ATGGGTAATT  
AACGGACACA TGAAACCCAA CCCACCCTTC CATAACACTT TTGTTTTGAA GTAAAAGTTG ACGTTTTAAA TACCCATTAA

Exon 44

9441 CTTACATTAA ATACATTGAT CCAAATTATA GAATGAGAAA CCTCCAGTTC ACTACTATAT CCTTAAATTT CAGTACCACT  
GAATGTAATT TATGTAAC TAAGTTAATAT CTTACTCTTT TGAGGTCAAG TGATGATATA GGAATTTAAA GTCATGGTGA

Exon 44

9521 AAAACAGAAG GTCTAATTGT ATGGATGGGA ATAGCTCAA ATGAAGAAAA TGATTTTCTG GCAATTGGTC TCCATAATCA  
TTTTGTCTTC CAGATTAACA TACCTACCCT TATCGAGTTT TACTTCTTT ACTAAAAGAC CGTTAACCAG AGGTATTAGT

Exon 44

9601 GACCTTGAAA ATAGCAGTTA ACTTGGGAGA AAGAATCTCT GTGCCTATGA GCTATAACAA TGGCACATTC TGTTGTAATA  
CTGGAACCTT TATCGTCAAT TGAACCTCT TTCTTAGAGA CACGGATACT CGATATTGTT ACCGTGTAAG ACAACATTAT



AJHG, Volume 83

|       |                 |            |            |             |            |            |            |                 |
|-------|-----------------|------------|------------|-------------|------------|------------|------------|-----------------|
|       | Exon 44         |            |            |             |            |            |            |                 |
| 9681  | AATGGCACCA      | TGTAGTTGTA | ATTCAAAATC | AGACTCTTAT  | CAAGGCCTAC | ATAAATAACA | GTCTAATTCT | TTCCGAGGAT      |
|       | TTACCGTGGT      | ACATCAACAT | TAAGTTTTAG | TCTGAGAATA  | GTTCCGGATG | TATTTATTGT | CAGATTAAGA | AAGGCTCCTA      |
|       | Exon 44         |            |            |             |            |            |            |                 |
| 9761  | ATTGATCCAC      | ATAAAAACTT | TGTGGCTCTA | AACTATGATG  | GCATTTGTTA | TCTAGGGGGC | TTTGAATATG | GTAGAAAGGT      |
|       | TAACTAGGTG      | TATTTTTGAA | ACACCGAGAT | TTGATACTAC  | CGTAAACAAT | AGATCCCCCG | AACTTATAC  | CATCTTTCCA      |
|       | Exon 44         |            |            |             |            |            |            |                 |
| 9841  | AAATATCGTT      | ACTCAAGAGA | TTTTTAAAAC | CAATTTTGTG  | GGCAAAATTA | AAGATGTTGT | ATTTTTTCAG | GAACCAAAAA      |
|       | TTTATAGCAA      | TGAGTCTCT  | AAAAATTTTG | GTTAAAACAA  | CCGTTTTAAT | TTCTACAACA | TAAAAAAGTC | CTTGGTTTTT      |
|       | Exon 44         |            |            |             |            |            |            | Exon 44, 3' UTR |
| 9921  | ACATTGAACT      | AATTAATTA  | GAAGGATACA | ATGTTTTATGA | TGGAGATGAA | CAAATGAGG  | TTACATAAGT | TAACACTAGA      |
|       | TGTAACCTGA      | TAAATTAAT  | CTCCTATGT  | TACAAATACT  | ACCTCTACTT | GTTTTACTCC | AATGTATTCA | ATTGTGATCT      |
|       | Exon 44, 3' UTR |            |            |             |            |            |            |                 |
| 10001 | GATTTTAGTA      | CACACTATAC | ATAAATGCAG | TTATTTTGAT  | AGTATTTCCT | TTGATACATT | GCTTACGGGG | AATCAACTGT      |
|       | CTAAAATCAT      | GTGTGATATG | TATTTACGTC | AATAAACTA   | TCAATAAAGA | AACTATGTAA | CGAATGCCCC | TTAGTTGACA      |
|       | Exon 44, 3' UTR |            |            |             |            |            |            |                 |
| 10081 | TTACTATATT      | ACCTGAAATA | GTCTAAATGC | TAACATATCT  | TTTTGATAAG | ATTGTAAAAT | GTCACTGAAG | GTTCTGATTG      |
|       | AATGATATAA      | TGGACTTTAT | CAGATTTACG | ATTGTATAGA  | AAAACCTATC | TAACATTTTA | CAGTGACTTC | CAAGACTAAC      |
|       | Exon 44, 3' UTR |            |            |             |            |            |            |                 |
| 10161 | TTTTTCCTAC      | ATCTAATTTA | TCTGTATATA | TTTTGATTCA  | TGTTTTAACT | CCATTAGTTC | AGTGCTTATT | CACAGAATGT      |
|       | AAAAAGGATG      | TAGATTAAT  | AGACATATAT | AAAACCTAAGT | ACAAAATTGA | GGTAATCAAG | TCACGAATAA | GTGTCTTACA      |
|       | Exon 44, 3' UTR |            |            |             |            |            |            |                 |
| 10241 | GCTTATTCAC      | TTTGCTTATT | CACTTTTAC  | CTATCCCTAA  | TGCTTACATT | TAAAATCAA  | CGTGTAACA  | CAATTTTAAA      |
|       | CGAATAAGTG      | AAACGAATAA | GTGAAAAATG | GATAGGGATT  | ACGAATGTAA | AATTTTAGTT | GCACATTTGT | GTTAAAATTT      |
|       | Exon 44, 3' UTR |            |            |             |            |            |            |                 |
| 10321 | AATCAATGTG      | TAAGCTGAAC | TTTAAAATGT | TTAAAATTCA  | GTTGGGAATG | AATTAGGGAT | AGGTACAAAT | AAGAAAAAAA      |
|       | TTAGTTACAC      | ATTCGACTTG | AAATTTTACA | AAATTTAAGT  | CAACCCTTAC | TTAATCCCTA | TCCATGTTTA | TTCTTTTTTT      |
|       | Exon 44, 3' UTR |            |            |             |            |            |            |                 |
| 10401 | TCAAGTTATT      | AATCAAAGGA | AAAATAAAAA | TTATACAAAG  | CTAAAAAAA  | AAAAAAA    | AAAAAAA    | AAAAA           |
|       | AGTTCAATAA      | TTAGTTTCCT | TTTATTTTT  | AATATGTTTC  | GATTTTTTTT | TTTTTTTTT  | TTTTTTTTT  | TTTTT           |



**Figure S3. Amino Acid Sequence and Domain Organization of EYS Protein**

1 MTDKSIIVILS LMVFNHSSFIN GKTCRRQLVE EWHPQPSSYV VNWTLTENIC  
 51 LDFYRDCWFL GVNTKIDTSG NQAVPQICPL QIQLGDILVI SSEPSLQFPE  
 101 INLMNVSETS FVGCVQNTTT EDQLLFGCRL KGMHTVNSKW LSVGTHYFIT  
 151 VMASGPSPCP LGLRLNVTVK QQFCQESLSS EFCSGHGKCL SEAWSKTYSC  
 201 HCQPPFSGKY CQELDACSFK PCKNNGSCIN KRENWDEQAY ECVCHPPFTG  
 251 KNCSEIIGQC QPHVCFHGNC SNITSNSFIC ECDEQFSGPF CEVSAKPCVS  
 301 LLFWKRGICP NSSSAYTYEC PKGSSSQNGE TDVSEFSLVP CQNGTDCIKI  
 351 SNDVMCICSP IFTDLLCKSI QTSCESFPLR NNATCKKCEK DYPCSCISGF  
 401 TEKNCEKAIID HCKLLSINCL NEEWCFNIIG RFKYVCIPGC TKNPCWFLKN  
 451 VYLIHQHLCY CGVTFHGICQ DKGPAQFEYV WQLGFAGSEG EKCOGVIDAY  
 501 FFLAANCTED ATYVNDPEDN NSSCWFPHEG TKEICANGCS CLSEEDSQEY  
 551 RYLCFLRWAG NMYLENTTDD QENECQHEAV CKDEINRPRC SCSLSYIGRL  
 601 CVVNVDYCLG NHSISVHGLC LALSHNCNCS GLQRYERNIC EIDTEDCKSA  
 651 SRKNGTTSTH LRGYFFRKCV PGFKGTQCEI DIDECASHPC KNGATCIDQP  
 701 GNYFCQCVPP FKVVDGFSCL CNPGYVGIRC EQDIDDCILN ACEHNSTCKD  
 751 LHLSYQCVCL SDWEGNFCEQ ESNECKMNPC KNNSTCTDLY KSYRCECTSG  
 801 WTGQNCS EEEI NECDS DPCMN GGLCHESTIP GQFVCLCPPL YTGQFCHQRY  
 851 NLCDLLHNPC RNNSTCLALV DANQHCICRE EFEGKNCEID VKDCLFLSCQ  
 901 DYGDCEDMVN NFRICICRPGF SGSLCEI EIN ECSSPECKNN GTCVDLTNRF  
 951 FCNCEPEYHG PFCELDVNKC KISPCLDEEN CVYRTDGYNC LCAPGYTGIN  
 1001 CEINLDECLS EPCLHDGVC I DGINHYTDC KSGFFGTHCE T NANCLSNP  
 1051 CLHGRYTELI NEYPCSCDAD GTSTQCK IKI NDCTSIPCMN EGFCQKSAHG  
 1101 FTCICPRGYT GAYCEKSIDN CAEPELNSVI CLNGGICVDG PGHTFDCRCL

1151 PGFSGQFCEI NINECSSSPC LHGADCEDHI NGHVCKCQPG WSGHHCENEL  
 1201 ECIPNSCVHE LCMENEPGST CLCTPGFMTG SIGLLCGDEI RRITCLTPIF  
 1251 QRTDPISTQT YTIPPSEILV SSFPSIKATR IPAIMDTYPV DQGPQTGIV  
 1301 KHDILPTTGL ATRLRISTPLE SYLLQELIVT RELSAKHSLL SSADVSSSRF  
 1351 LNFGIRDPAQ IVQDKTSVSH MPIRTSAATL GFFFPDRRAR TPFIMSSLMS  
 1401 DFIFPTQSLF FENCQTVALS ATPITTSVIRS IPGADIELNR QSLLSRGFLL  
 1451 IAASISATPV VSRGAQEDIE EYSADSLISR REHWRLSPS MSPIFPAKVI  
 1501 ISKQVTILNS SALHRFSTKA FNPSEYQAIT EASSNQRLTN IKSQAADSLR  
 1551 ELSQTCATCS MTEIKSSREF SDQVLHSHKQS HFYETFWMNS AILASWYALM  
 1601 GAQTITSGHS FSSATEITPS VAFTEVPSLF PSKKSARTI LSSSLEESIT  
 1651 LSSNLDVNLC LDKTCLSIVP SQTISSDLMN SDLTSKMTTD ELSVSENILK  
 1701 LLKIRQYGIT MGPTEVLNQE SLLDMEKSKG SHTLFKLHPS DSSLDFELNL  
 1751 QIYPDVTLKT YSEITHANDF KNNLPPLTGS VPDFSEVTTN VAFYTVSATP  
 1801 ALSIQTSSSM SVIRPDWPYF TDYMTSLKKE VKTSSEWSKW ELQPSVQYQE  
 1851 FPTASRHLPF TRSLTLSSLE SILAPQRLMI SDFSCVRYYG DSYLEFQNVA  
 1901 LNPQNNISLE FQTFSSYGLL LHVKQDSNLV DGFFIQLFIE NGTLKYHFYC  
 1951 PGEAKFKSIN TTVRVDNGQK YLLIRQELD PCNAELTILG RNTQICESIN  
 2001 HVLGKPLPKS GSVFIGGFPD LHGKIQMPVP VKNFTGCIEV IEINNRSFI  
 2051 PSKAVKNYHI NNCRSQGFML SPTASFVDAS DVTQGVDTMW TSVSPSVAAP  
 2101 SVCQQDVCHN GGTCHAIFLS SGIVSFQCDC PLHFTGRFCE KDAGLFFPSF  
 2151 NGNSYLELPF LKFVLEKEHN RTVTIYLTIK TNSLNGTILY SNGNCGKQF  
 2201 LHLFLVEGRP SVKYGCGNSQ NILTVSANYS INTNAFTPIT IRYTTPVGSP  
 2251 GVVCMIEMTA DGKPPVQKKD TEISHASQAY FESMFLGHIP ANVQIHKKAG

2301 P V Y G F R G C I L D L Q V N N K E F F I I D E A R H G K N I E N C H V P W C A H H L C R N N G T C  
 2351 I S D N E N L F C E C P R L Y S G K L C Q F A S C E N N P C G N G A T C V P K S G T D I V C L C P Y  
 2401 G R S G P L C T D A I N I T Q P R F S G T D A F G Y T S F L A Y S R I S D I S F R Y E F H L K F Q L  
 2451 A N N H S A L Q N N L I F F T E Q K G H G L N G D D F L A V G L L N G S V V Y S Y N L G S G I A S I  
 2501 R S E P L N L S L G V H T V H L G K F F Q E G W L K V D D H K N K S I I A P G R L V G L N V F S Q F  
 2551 Y V G G Y S E Y T P D L L P N G A D F K N G F Q G C I F T L Q V R T E K D G H F R G L G N P E G H P  
 2601 N A G R S V G Q C H A S P C S L M K C G N G G T C I E S G T S V Y C N C T T G W K G S F C T E T V S  
 2651 T C D P E H D P P H H C S R G A T C I S L P H G Y T C F C P L G T T G I Y C E Q A L I L I V I L E K  
 2701 P K P A E R K V K K E A L S I S D P S F R S N E L S W M S F A S F H V R K K T H I Q L Q F Q P L A A  
 2751 D G I L F Y A A Q H L K A Q S G D F L C I S L V N S S V Q L R Y N L G D R T I I L E T L Q K V T I N  
 2801 G S T W H I I K A G R V G A E G Y L D L D G I N V T E K A S T K M S S L D T N T D F Y I G G V S S L  
 2851 N L V N P M A I E N E P V G F Q G C I R Q V I I N N Q E L Q L T E F G A K G G S N V G D C D G T A C  
 2901 G Y N T C R N G G E C T V N G T T F S C R C L P D W A G N T C N Q S V S C L N N L C L H Q S L C I P  
 2951 D Q S F S Y S C L C T L G W V G R Y C E N K T S F S T A K F M G N S Y I K Y I D P N Y R M R N L Q F  
 3001 T T I S L N F S T T K T E G L I V W M G I A Q N E E N D F L A I G L H N Q T L K I A V N L G E R I S  
 3051 V P M S Y N N G T F C C N K W H H V V I Q N Q T L I K A Y I N N S L I L S E D I D P H K N F V A L  
 3101 N Y D G I C Y L G G F E Y G R K V N I V T Q E I F K T N F V G K I K D V V F F Q E P K N I E L I K L  
 3151 E G Y N V Y D G D E Q N E V T

Protein motifs are as follows:

Signal peptide; EGF-domains; Calcium-binding EGF-  
 domains; EGF-like domains; O-linked glycosylation;  
 Laminin A G-like domains



**Table S1. Primers Used for Genomic Sequence Analysis of Human *EYS***

| Exon  | Forward (5'>3')            | Reverse (5'>3')              | Amplicon Length (bp) |
|-------|----------------------------|------------------------------|----------------------|
| 1     | TTATGTCAGCCTGCACATGG       | GTAGTTGTGTTTCAGCTAGGC        | 286                  |
| 2     | AGCTAAAGGCAGGATACTGG       | ATGGAAAGCAGGGAATGAGG         | 315                  |
| 3     | GAAGACTCATTCTAGGTTAGTC     | CACTGCAAAGATAGTGTCCAC        | 472                  |
| 4A    | CTTAAACACCATTTTGCAGC       | ATGTGTCCCAACACTCAGCC         | 498                  |
| 4B    | ACTTCTACAGAGATTGCTGG       | AGATTCCTGGCAGAAGTGC          | 376                  |
| 4C    | GTGGTCCATCACCTTGTCC        | TAGAGACGGGGTTTCACCG          | 486                  |
| 5     | AGAATTGAGGGAAAAGTATGG      | CATAAAAGAGTTCAGTATATATACC    | 322                  |
| 6     | TCTATGCTCATTCTTCTTTCCTTC   | AAAATAAGTAGACCGTTCCTGTTCG    | 403                  |
| 7     | TTCTCCAGGTAAGAACCATTTC     | TTAAGTAAAAGTTAGGGTTAAAACCCAG | 311                  |
| 8     | TTGGAATAATGTTAATAGGCTTTTC  | TGGCTAAGATTAATAAGAGCATTGG    | 285                  |
| 9     | GGCTTTTGAACATGGATATGAC     | AGATTTCTAGGATGTAGTTGGTG      | 559                  |
| 10    | GGAACCTATTTTGTGGCAGATG     | GACTGTTGAGAATTTGTTTACGAAG    | 427                  |
| 11    | GGTTTCATCTTAGTAGACAGAGAGGC | CATTGTTACCATGAAACAGTTCG      | 368                  |
| 12    | TGCACCCACAACCTATCTTC       | AATTGCCCAAAGAAGCAATC         | 570                  |
| 13    | TTCAGATGTCATCCTAAGTGG      | CAGACAAGAGACAGAAGTGC         | 293                  |
| 14    | GGATATTTTTCATTGTTGCTTTGC   | TGAATCCAATAAGTGAACAGTTTG     | 655                  |
| 15    | GAGATATCAAATGGCCAGGAG      | ATCCCAAGGACACTGAGCAC         | 273                  |
| 16    | CACCACATACTATTAGTTCAAG     | ATTTTAGGAGGCCATCATCC         | 447                  |
| 17-18 | ATTCTTTAGACTACCACTGATTC    | ACATAATGAGCACATGTGTGC        | 551                  |
| 19    | AGCAGAACAATAATTTGCAAGG     | CATCTGGCAGATTATTTTCAGG       | 425                  |
| 20    | AGAGAGGTCTTCATTTCTTGG      | AGCTCTGTTTTATGAAAAGAGC       | 395                  |
| 21    | AAACCCAGGAATAAACTCTGC      | GGAAGAAATGACTCTGAAACC        | 322                  |
| 22    | GTCAAACAAGTTTGCACATCAG     | GAAAGCAAAACATGGGAGTG         | 531                  |
| 23    | AACTCATTGTCACCCCAAGG       | TCCTGATGAAAGCCTAAGTGC        | 486                  |
| 24    | AATGGCACACGGATAAGAG        | GAGGAATGCCGAGAAAAGTG         | 572                  |
| 25    | GAGCTATCCAATATGTCTATGG     | GCAGAAAATATGCTTTTACCAC       | 378                  |
| 26A   | TTATCCCAAGTCCCAAAGTGG      | AGTAATGACTGCCTGTTTAGC        | 525                  |
| 26B   | ACTGTTGCTTTATCTGTACC       | GAACATGTTGCACATGTTTGG        | 434                  |
| 26C   | TACTGAGGCTTCAAGCAACC       | GTGGGTCCCATAGTTATGCC         | 555                  |
| 26D   | ATCCATTGTCCCTTCACAAAC      | TACAGACATGGAGGAAGACG         | 439                  |
| 26E   | GATTTTTCAGAAGTCACCACC      | CTGATTACAATGAGGCTGTTT        | 410                  |
| 27    | AAAGAGGCAGGAAAGAGACG       | AGGAAGAGACATCCTGGTGG         | 443                  |
| 28    | ACTTCATGTCTCTCCAAAGTG      | ATTGTTAGGGATAGCCTTTGC        | 273                  |
| 29    | TGCTTCTGGCTTTGTTTTATTG     | TGAAAAACAGACTGACATTGG        | 521                  |
| 30    | TGCATACCCTGACCAGTTTG       | CGTAGGAATGTGAAGCAAAAAC       | 335                  |
| 31    | GTTAAACCTTGATCAGTATTGG     | ACAGCTGTTTCTGTTTGTGC         | 475                  |
| 32    | TGCTTCATGCACTGGTCTGG       | GTGTTACCTTTTCAAATGAATGC      | 552                  |
| 33    | CTAATAGCACTCCTACCAACC      | TCTGTAGTCCCAACTACTTGG        | 465                  |
| 34    | CTTGAAAATGTCCCACTTGG       | TTTCTGGTGCTTTGTTGAGAG        | 405                  |
| 35    | AACTAGCCAACAATAGCAACC      | CTCTCAGAGGACAATACTGC         | 447                  |
| 36    | AGTGGAAAGCACACAGCTAC       | TTGATCAGTCAAGTGCTATCC        | 458                  |
| 37    | TTAGTTGCTCAATGCTGAAGG      | CAATTAGAGTGTCCCTGAGG         | 410                  |
| 38    | CAGCCAGTTGCACATATACC       | GTGAACTTCGTGGATGTAGG         | 438                  |
| 39    | AGCAGAGAATTGAGTGGTATC      | GAAAGCAATCCATATAGCTGG        | 410                  |
| 40    | TCTCTGCGCATTCTGTATTTC      | ATGTGCATCTGTTTGTGTTCC        | 438                  |
| 41    | AAATTGACAAGTTAGCATCAGG     | AAGTACTAGTCTATCTGTGAAG       | 432                  |
| 42    | GAACTGCAGGACAGATGTAC       | CCTAATCTAAGCTCCAATCC         | 323                  |
| 43    | TTGATGTACTACCTACAAGC       | ACGCATACACTTGCAGTGAC         | 444                  |
| 44A   | CACAATTGTGCTCAAGATCTG      | TACATTTGAGCCACCTTTTGC        | 511                  |
| 44B   | TGAACCTGTAGGTTTTCAAGG      | TGAACTGGAGGTTTCTCATTTC       | 422                  |
| 44C   | TTCTTACAGTTGCCTGTGTAC      | TTTATGTGGATCAATATCCTCG       | 424                  |
| 44D   | TTCTGTTGTAATAAATGGCACC     | ACAATCAGAACCCTCAGTGAC        | 394                  |

**Table S2. ARMS Primers Used to Screen for c.9468T>A**

|                       | Forward (5' > 3')                  | Reverse (5' > 3')              | Amplicon Length (bp) |
|-----------------------|------------------------------------|--------------------------------|----------------------|
| wild-type combination | CAGTCTAATTCTTTCCGAGGATATTGATCC     | TATGTAACCTCATTTTGTTCATCTCCATAA | 249                  |
| mutant combination    | TGAACTAATTAAATTAGAAGGATACAATGTTTAA | GGTAATATAGTAAACAGTTGATTCCCCGTA | 169                  |

**Table S3. Primers Used for cDNA Sequence Analysis of Human *EYS***

| No.* | Exon | Forward (5' > 3')            | Reverse (5' > 3')           | Comment                    |
|------|------|------------------------------|-----------------------------|----------------------------|
| AP   |      | CCATCCTAATACGACTCACTATAGGGC  |                             | RACE adaptor primer        |
| NAP  |      | ACTCACTATAGGGCTCGAGCGGC      |                             | RACE nested adaptor primer |
| 1    | 4    | GTGGTCCATCACCTTGTC           |                             |                            |
| 2    | 4    |                              | TGAGGGTTGTGGATGCCATTCTCCAC  | 5' RACE nested PCR         |
| 3    | 11   | GAGTGAAGAAGACAGTCAGGAATATCGG |                             |                            |
| 4    | 11   | GTTTTCTCAGATGGGCTGGCAACATG   |                             | Nested PCR                 |
| 5    | 12   |                              | GCTACAGTTACAATTGTGCG        |                            |
| 6    | 13   |                              | TGCAGGGATGTGAAGCACACTCATC   | 5' RACE PCR                |
| 7    | 17   | CCTTCCTGCCAGGATTATGGTGACTG   |                             | Nested PCR                 |
| 8    | 17   |                              | GCAGGAAAGGAAGAGGCAGTCTTTCAC | Nested PCR                 |
| 9    | 29   | AGGATCTGTCTTCATTGGTG         |                             |                            |
| 10   | 41   | CACCACTGTAGCAGAGGAGCAACCTG   |                             | 3' RACE PCR                |
| 11   | 41   | GGAACCACTGGAATCTACTGTGAAC    |                             | 3' RACE nested PCR         |
| 12   | 41   |                              | GAAATGCAGGTTGCTCCTCTGCTACAG |                            |
| 13   | 41   |                              | ACAGTGGTGTGGAGGGTCATGTTTCAG | Nested PCR                 |
| 14   | 44   |                              | TACATTTGAGCCACCTTTTGC       |                            |

\* Numbers corresponding to primers in Figure S1.

**Table S4. Primers Used for RT-PCR of Human *EYS***

| Exon  | Forward (5' > 3')     | Reverse (5' > 3')     |
|-------|-----------------------|-----------------------|
| 9–12  | CTAATTCATCAACACCTCTGC | GCTACAGTTACAATTGTGCG  |
| 16–19 | TGTACATCTGGATGGACTGG  | GCAGTTGTATCCATCAGTCC  |
| 21–26 | GTTCATGTGATGCAGATGGG  | AGTAATGACTGCCTGTTTAGC |
| 29–37 | AGGATCTGTCTTCATTGGTG  | CAGTGCTGAGTGGTTGTTTG  |
| 41–44 | ACCCTCCACACCACTGTAGC  | GCCTTCTGCACCAACTCTTC  |
| ACTB  | GGGACGACATGGAGAAAATC  | CAGAGGCGTACAGGGATAGC  |

**Table S5. Exon and Intron Sizes of Human *EYS***

| <b>Exon/Intron</b>                  | <b>Exon Size (nt)</b> | <b>Intron Size (nt)</b> |
|-------------------------------------|-----------------------|-------------------------|
| 1                                   | 43                    | 67.243                  |
| 2                                   | 115                   | 143.785                 |
| 3                                   | 135                   | 252                     |
| 4                                   | 945                   | 3.956                   |
| 5                                   | 114                   | 85.227                  |
| 6                                   | 194                   | 2.569                   |
| 7                                   | 128                   | 17.978                  |
| 8                                   | 115                   | 30.769                  |
| 9                                   | 160                   | 9.281                   |
| 10                                  | 140                   | 8.892                   |
| 11                                  | 167                   | 38.861                  |
| 12                                  | 257                   | 238.136                 |
| 13                                  | 114                   | 59.911                  |
| 14                                  | 122                   | 51.668                  |
| 15                                  | 122                   | 33.050                  |
| 16                                  | 260                   | 9.984                   |
| 17                                  | 97                    | 184                     |
| 18                                  | 108                   | 15.271                  |
| 19                                  | 146                   | 63.875                  |
| 20                                  | 172                   | 934                     |
| 21                                  | 79                    | 8.068                   |
| 22                                  | 200                   | 187.133                 |
| 23                                  | 125                   | 8.588                   |
| 24                                  | 116                   | 24.109                  |
| 25                                  | 193                   | 1.128                   |
| 26                                  | 1.767                 | 150.871                 |
| 27                                  | 191                   | 2.897                   |
| 28                                  | 92                    | 47.334                  |
| 29                                  | 151                   | 80.403                  |
| 30                                  | 113                   | 76.146                  |
| 31                                  | 233                   | 148.590                 |
| 32                                  | 147                   | 15.365                  |
| 33                                  | 154                   | 67.155                  |
| 34                                  | 109                   | 14.472                  |
| 35                                  | 221                   | 120.025                 |
| 36                                  | 173                   | 57.814                  |
| 37                                  | 183                   | 16.966                  |
| 38                                  | 167                   | 809                     |
| 39                                  | 145                   | 9.925                   |
| 40                                  | 175                   | 15.373                  |
| 41                                  | 173                   | 20.486                  |
| 42                                  | 63                    | 15.233                  |
| 43                                  | 162                   | 4.719                   |
| 44                                  | 1.689                 |                         |
| <b>Subtotals</b>                    | <b>10.475</b>         | <b>1.975.435</b>        |
| <b>Human <i>EYS</i> total size:</b> |                       | <b>1.985.910</b>        |
